# Supplementary material
Source: PubMed Central journal article supplement (PMC4917410)
Supplement: NIHMS792099-supplement-2.pdf [file NIHMS792099-supplement-2.pdf]

## **Supplementary Data**

### **Structural analysis of the activation-induced deoxycytidine deaminase required in immunoglobulin diversification**

Phuong Pham<sup>1,#</sup>, Samir A. Afif<sup>1</sup>, Mayuko Shimoda<sup>2,3,4</sup>, Kazuhiko Maeda<sup>3,4</sup>, Nobuo Sakaguchi<sup>4,5</sup>, Lars C. Pedersen<sup>6,#</sup>, & Myron F. Goodman<sup>1,7\*</sup>

**a**

|                                                | Transfected Ramos B-cells |       |                    |
|------------------------------------------------|---------------------------|-------|--------------------|
|                                                | Control                   | AID   | AIDv( $\Delta$ 15) |
| Number of sequenced IgV <sub>H</sub> clones    | 50                        | 58    | 67                 |
| Number of substitution mutations               | 16                        | 64    | 75                 |
| Mutation frequency (x 10 <sup>-3</sup> per bp) | 1.0                       | 3.0   | 3.3                |
| Transitions/Transversions (%)                  | 63/38                     | 52/48 | 63/37              |
| Mutations at A/T sites (%)                     | 19                        | 18    | 15                 |
| Mutations at C/G sites (%)                     | 81                        | 83    | 85                 |

**b**

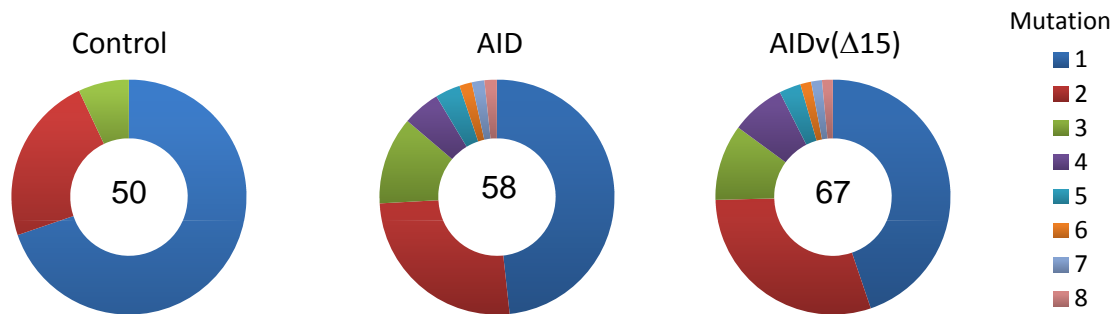

**c**

| Control |   |   |   |   |       | AID     |    |    |   |    |       | AIDv( $\Delta$ 15) |    |    |   |    |       |
|---------|---|---|---|---|-------|---------|----|----|---|----|-------|--------------------|----|----|---|----|-------|
| To/From | A | C | G | T | Total | To/From | A  | C  | G | T  | Total | To/From            | A  | C  | G | T  | Total |
| A       |   | 0 | 1 | 1 | 13%   | A       |    | 3  | 3 | 2  | 13%   | A                  |    | 0  | 4 | 2  | 8%    |
| C       | 0 |   | 1 | 4 | 31%   | C       | 3  |    | 2 | 14 | 30%   | C                  | 1  |    | 6 | 18 | 33%   |
| G       | 4 | 4 |   | 0 | 50%   | G       | 14 | 15 |   | 5  | 53%   | G                  | 22 | 13 |   | 4  | 52%   |
| T       | 0 | 1 | 0 |   | 6%    | T       | 0  | 2  | 1 |    | 5%    | T                  | 0  | 3  | 2 |    | 7%    |

**Supplementary Figure 1. AIDv( $\Delta$ 15)-induced IgV<sub>H</sub> SHM in Ramos B-cells.** **a)** Analysis of IgV<sub>H</sub> SHM mutations induced by AID and AIDv( $\Delta$ 15). Retroviruses, carrying AID or AIDv( $\Delta$ 15) along with the mock control were used to infect Ramos B-cells. After culturing for 2 weeks, IgV<sub>H</sub> region DNA from infected B-cells was subjected to DNA sequencing analysis. **b)** Distribution of sequenced IgV<sub>H</sub> clones. The number in the center of the pie chart indicates the number of IgV<sub>H</sub>-regions analyzed. Colored sectors indicate the distribution of clones with a given number of base substitution mutations from 0 to 8. **c)** Mutation matrices showing the types and numbers of mutations in the IgV<sub>H</sub>-region.

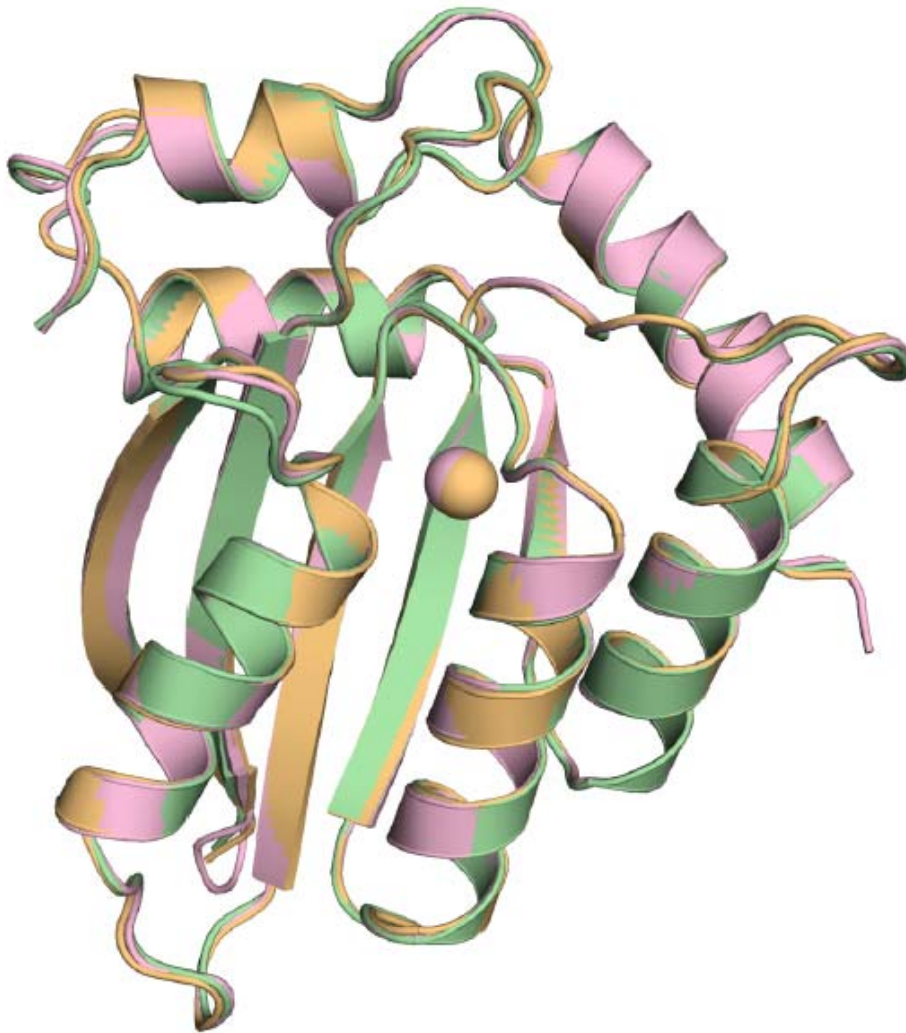

**Supplementary Figure 2. Superpositions of the three AID molecules in the crystal asymmetric unit.** All molecules are very similar with mol A (green) and mol B (pink) having RMSD of 0.37 and 0.27 over 171 C $\alpha$ s respectively to mol C (peach).

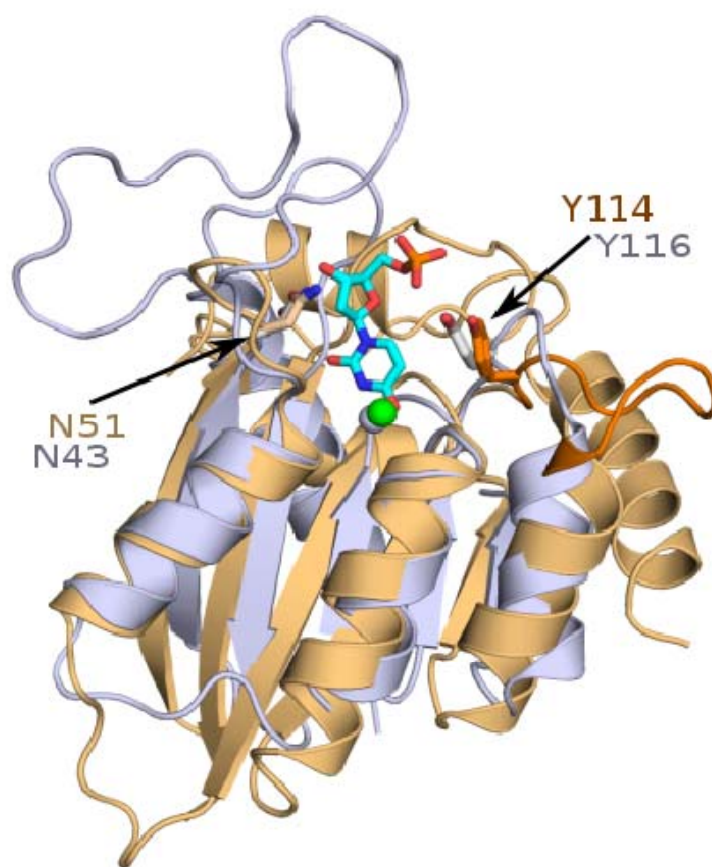

**Supplementary Figure 3.** Superposition of the crystal structure of deoxycytidylate deaminase from bacteriophage S-TIM5 (grey, pdb 4P9C) with AID (peach, specificity loop orange). Superposition is based on residues 67 to 73 and 93 to 100 of S-TIM5 and 56 to 62 and 85 to 92 of AID (RMSD 0.40 on Cas). dUMP S-TIM5 is colored cyan. The Zn atoms from AID and S-TIM5 are colored green and grey respectively. Sidechains N43 and Y116 from S-TIM5 (grey labels) that position the dUMP are shown along with the corresponding residues N51 and Y114 from AID (peach and orange labels).

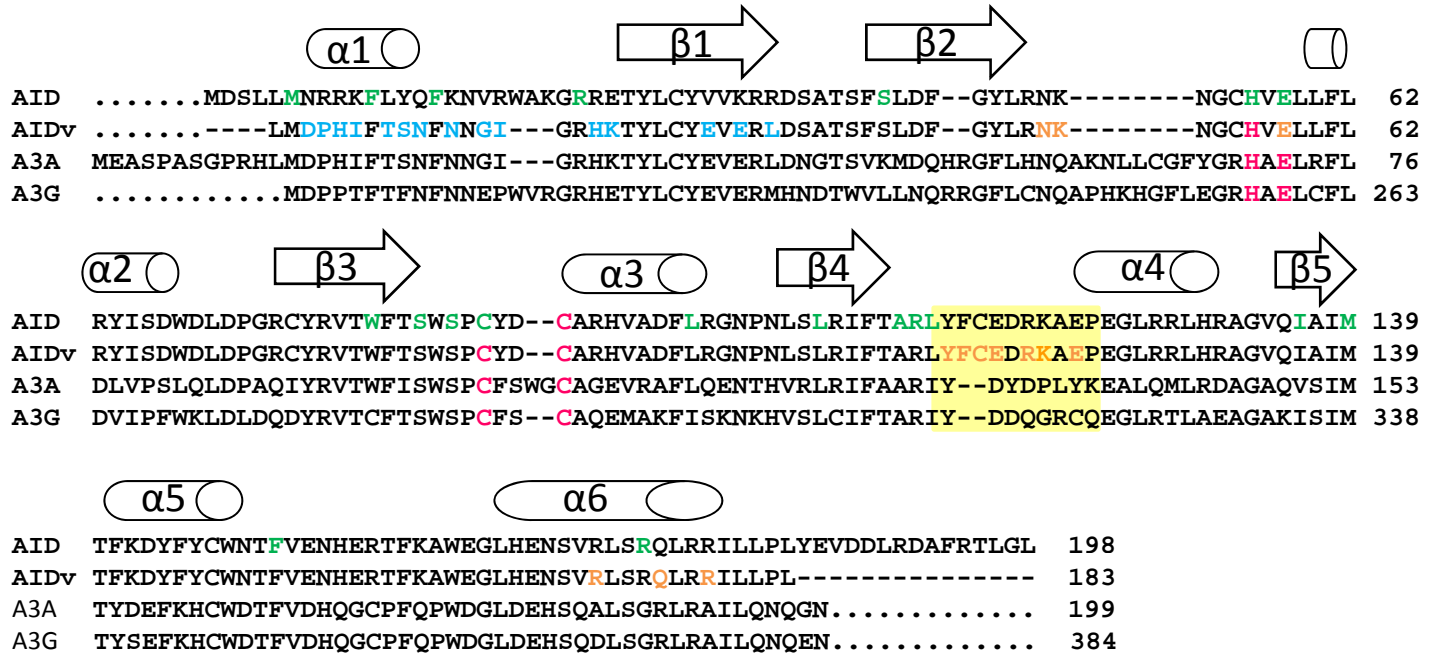

Blue AID solubility mutations  
 Green HIGM2 mutation sites on AID  
 Orange site-directed mutations sites in this study  
 Magenta Conserved active site residues  
 Light peach background specificity loop

Supplementary Figure 4. Amino-acid sequence alignment of AID, AIDv( $\Delta 15$ ), Apo3A and Apo3G

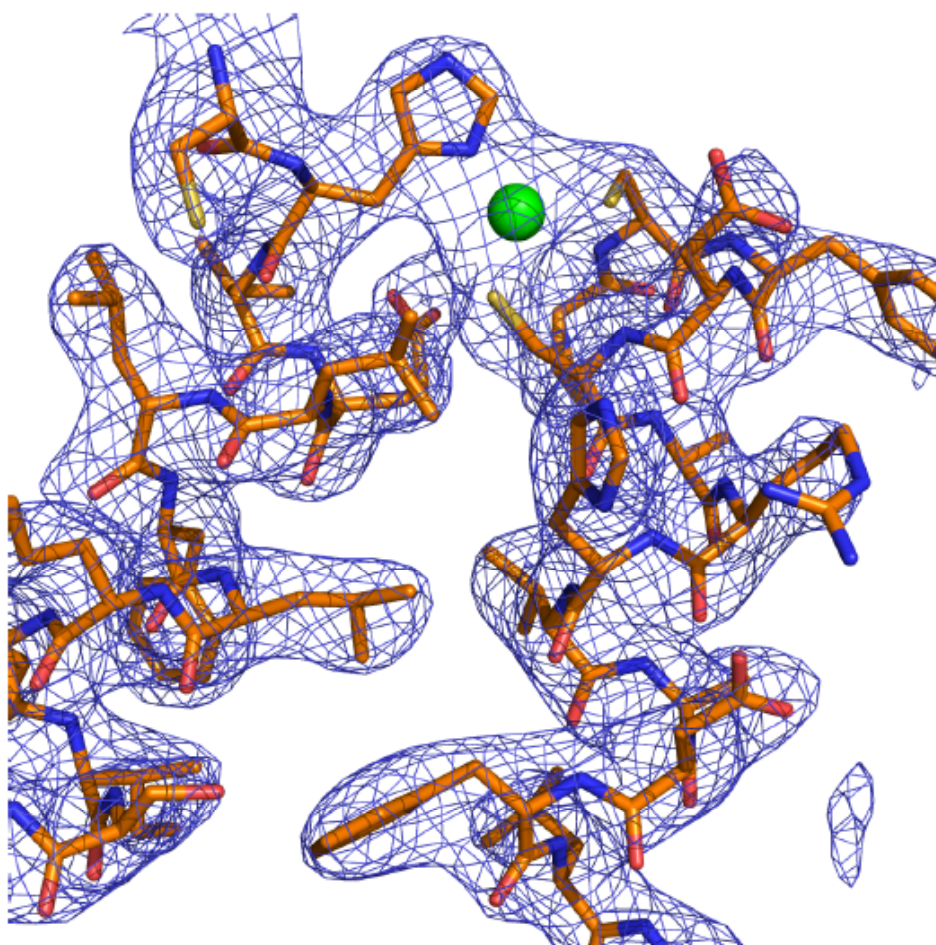

**Supplementary Figure 5.** 2Fo-Fc electron density contoured at 1.0  $\sigma$  of helices 2 and 3 in the crystal structure of AIDv( $\Delta$ 15).

**Supplementary Table 1. Data collection and refinement statistics for MBP-AIDv( $\Delta$ 15)**

|                                                      | Low Res                  | High Res               |
|------------------------------------------------------|--------------------------|------------------------|
| <b>Data collection</b>                               |                          |                        |
| Space group                                          | P32                      | P2 <sub>1</sub>        |
| Cell dimensions                                      |                          |                        |
| <i>a</i> , <i>b</i> , <i>c</i> (Å)                   | 111.27, 111.27, 200.04   | 106.79, 96.81, 108.69  |
| $\alpha$ , $\beta$ , $\gamma$ (°)                    | 90.0, 90.0, 120          | 90.0, 102.87, 90.0     |
| Resolution (Å)                                       | 50.00-3.10 (3.15-3.10) * | 50.00-2.80 (2.85-2.80) |
| <i>R</i> <sub>sym</sub> or <i>R</i> <sub>merge</sub> | 0.05 (0.62)              | 0.07 (0.77)            |
| <i>I</i> / $\sigma I$                                | 11.6 (2.5)               | 10.3 (2.0)             |
| Completeness (%)                                     | 99.2 (99.0)              | 99.8 (100.0)           |
| Redundancy                                           | 4.1 (4.1)                | 3.8 (3.8)              |
| <b>Refinement</b>                                    |                          |                        |
| Resolution (Å)                                       |                          | 50.0-2.8               |
| No. reflections                                      |                          | 52657                  |
| <i>R</i> <sub>work</sub> / <i>R</i> <sub>free</sub>  |                          | 0.18/0.23              |
| No. atoms                                            |                          | 12734                  |
| Protein                                              |                          | 12560                  |
| Ligand/ion                                           |                          | 132/6                  |
| Water                                                |                          | 36                     |
| <i>B</i> -factors                                    |                          |                        |
| Protein                                              |                          |                        |
| (molA/molB/molC)                                     |                          | 74.7/82.0/66.1         |
| Ligand/ion                                           |                          | 56.7/90.4              |
| Water                                                |                          | 55.7                   |
| R.m.s. deviations                                    |                          |                        |
| Bond lengths (Å)                                     |                          | 0.008                  |
| Bond angles (°)                                      |                          | 0.817                  |

\*Values in parentheses are for highest-resolution shell. Both data sets were from single crystals

**Supplementary Table 2.** AID, AID<sub>v</sub>( $\Delta 15$ ), AID<sub>v</sub>, Apo3A and Apo3G mutability indexes

| Motif (5'-3')   | Mutability Index (MI)* |                                  |                  |               |               |
|-----------------|------------------------|----------------------------------|------------------|---------------|---------------|
|                 | AID                    | AID <sub>v</sub> ( $\Delta 15$ ) | AID <sub>v</sub> | Apo3A         | Apo3G         |
| Hotspot         |                        |                                  |                  |               |               |
| AAC             | 1.7                    | 0.8                              | 1                | 0             | 0             |
| AGC             | 1.5                    | 0.8                              | 1.1              | 0.1           | 0             |
| TAC             | 1.8                    | 1.7                              | 2.6              | 0.5           | 0.4           |
| TGC             | 2.4                    | 1.2                              | 1.7              | 0.4           | 0             |
| WRC average     | 1.8 $\pm$ 0.4          | 1.1 $\pm$ 0.4                    | 1.6 $\pm$ 0.8    | 0.2 $\pm$ 0.2 | 0.1 $\pm$ 0.2 |
| Coldspot        |                        |                                  |                  |               |               |
| CCC             | 0.3                    | 1.4                              | 1.1              | 2.2           | 11.9          |
| CTC             | 1.1                    | 1.1                              | 0.9              | 4.1           | 0.5           |
| GCC             | 0.2                    | 0.5                              | 0.3              | 0.3           | 0.3           |
| GTC             | 0.4                    | 1                                | 0.6              | 2             | 0             |
| SYC average     | 0.5 $\pm$ 0.4          | 1.0 $\pm$ 0.4                    | 0.7 $\pm$ 0.3    | 2.1 $\pm$ 1.6 | 3.2 $\pm$ 5.8 |
| Neutral         |                        |                                  |                  |               |               |
| ACC             | 1.2                    | 0.8                              | 0.3              | 0.5           | 1.0           |
| ATC             | 0.9                    | 1.5                              | 0.9              | 1.5           | 0.5           |
| CAC             | 0.9                    | 0.9                              | 1.0              | 0.0           | 0.0           |
| CGC             | 1.2                    | 0.8                              | 0.6              | 0.0           | 0.0           |
| GAC             | 0.5                    | 0.3                              | 0.7              | 0.1           | 0.0           |
| GGC             | 0.7                    | 0.5                              | 0.7              | 0.0           | 0.0           |
| TCC             | 0.6                    | 1.6                              | 1.2              | 2.7           | 1.5           |
| TTC             | 0.6                    | 0.9                              | 1.3              | 1.7           | 0.0           |
| Neutral average | 0.8 $\pm$ 0.3          | 0.9 $\pm$ 0.4                    | 0.8 $\pm$ 0.3    | 0.8 $\pm$ 1.0 | 0.4 $\pm$ 0.6 |
