# Supplementary material
Source: PubMed Central journal article supplement (PMC4917410)

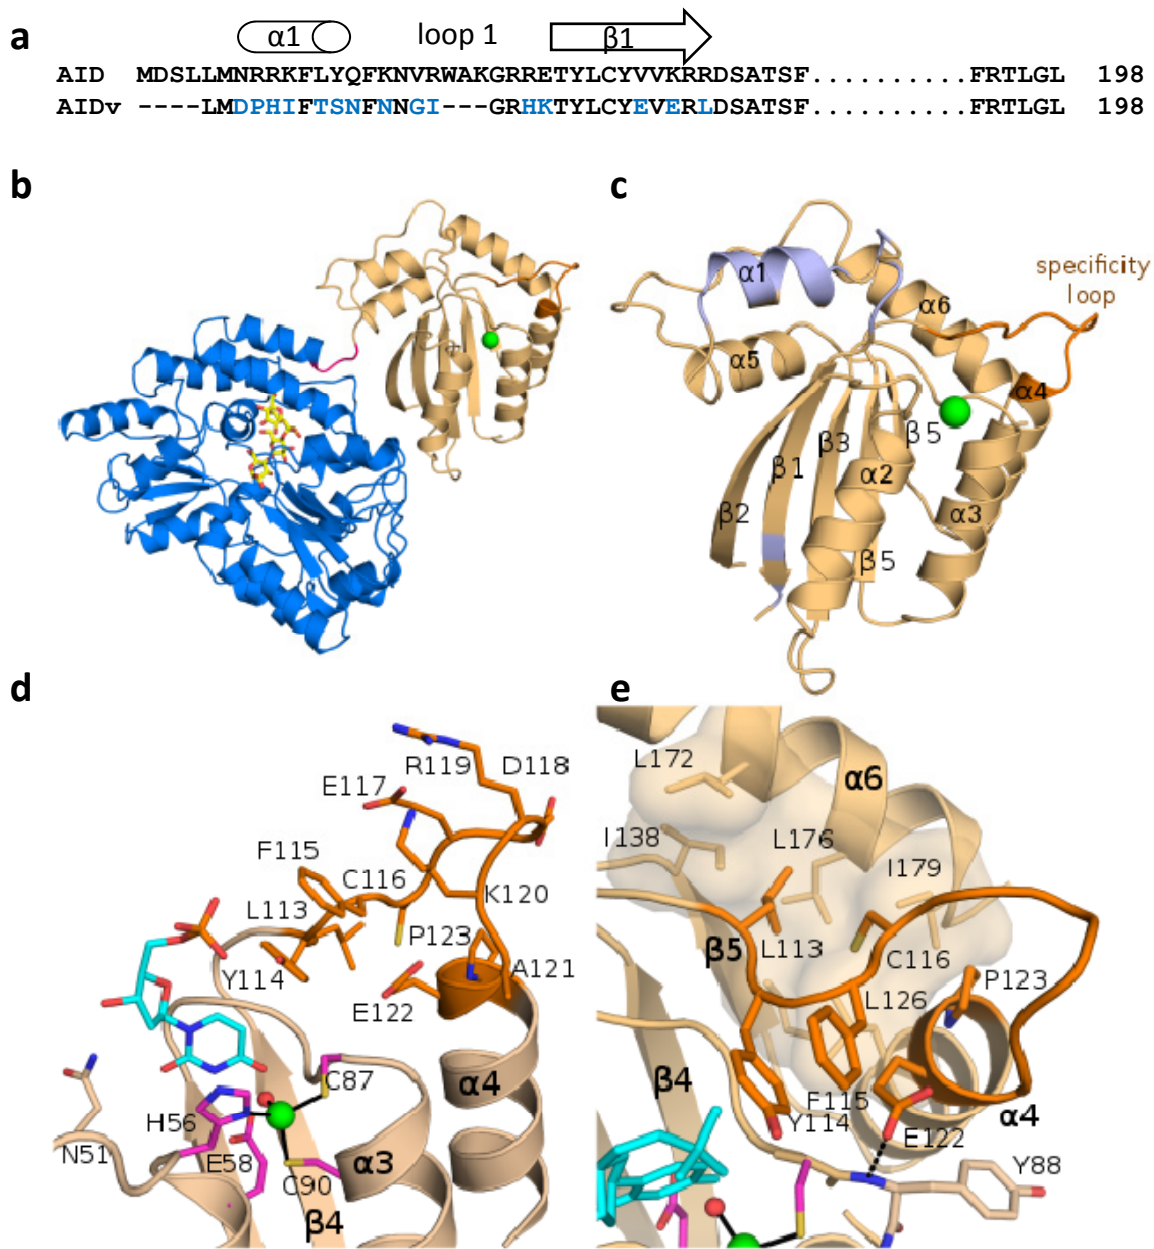

Figure 1

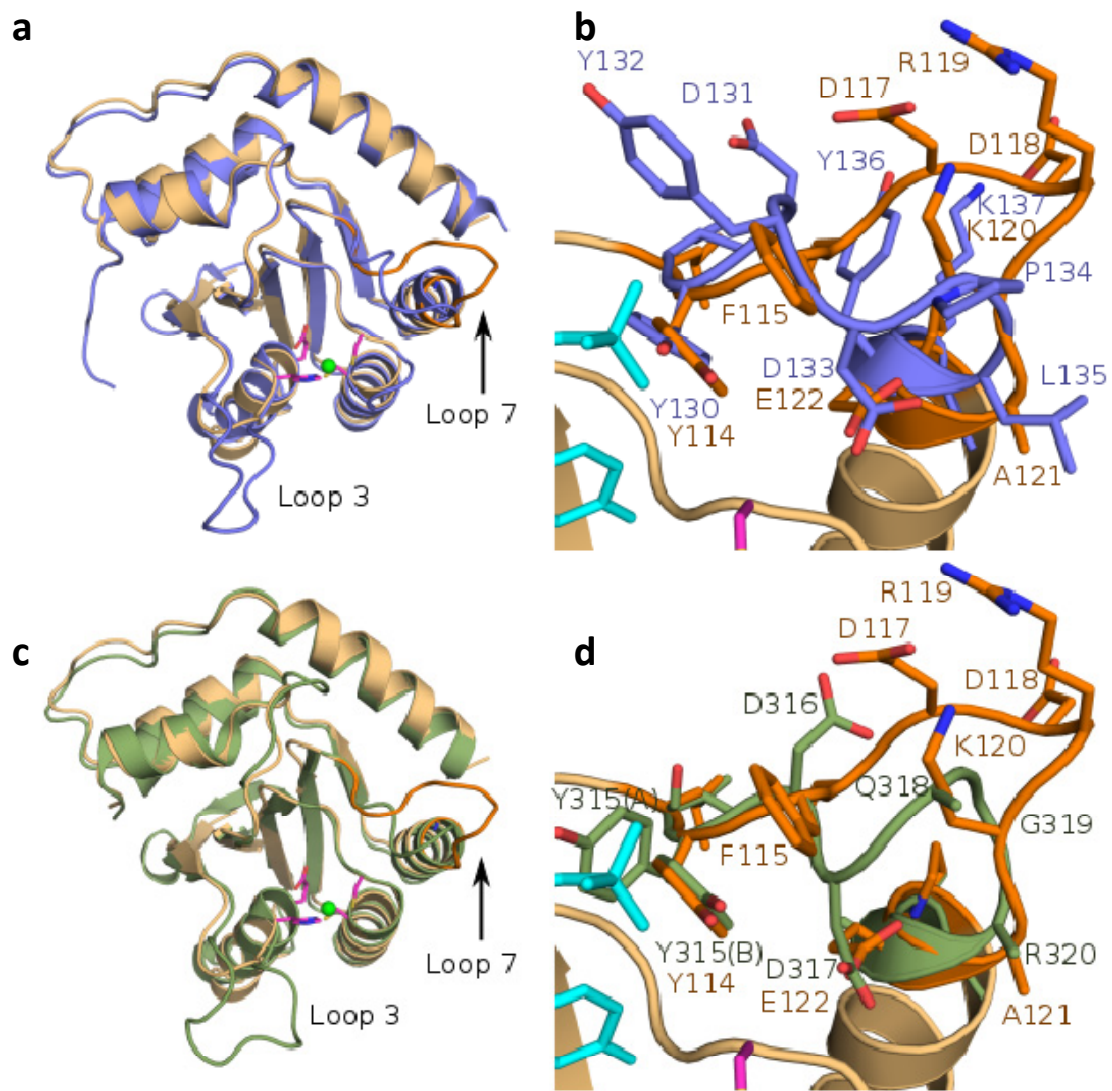

**Figure 2**

**a**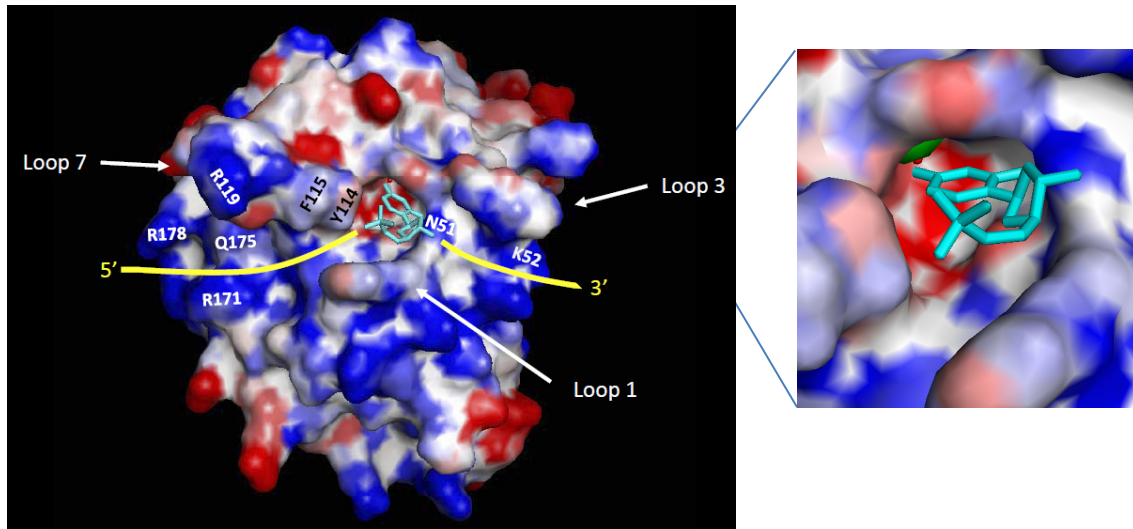**b**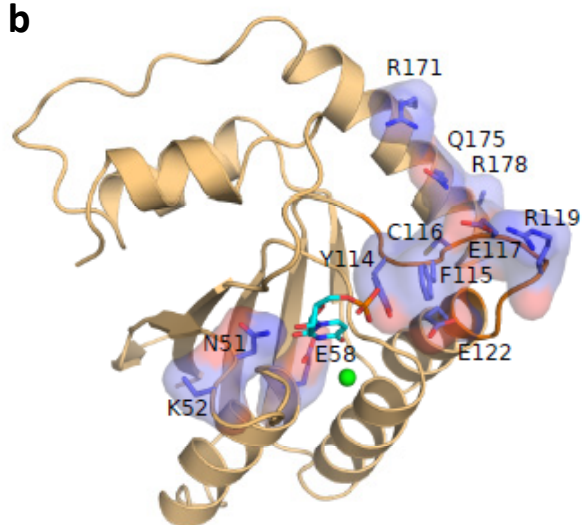**c**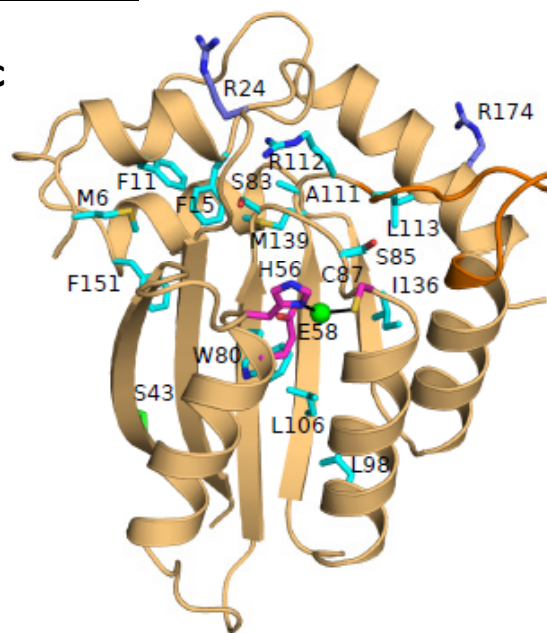**Figure 3**

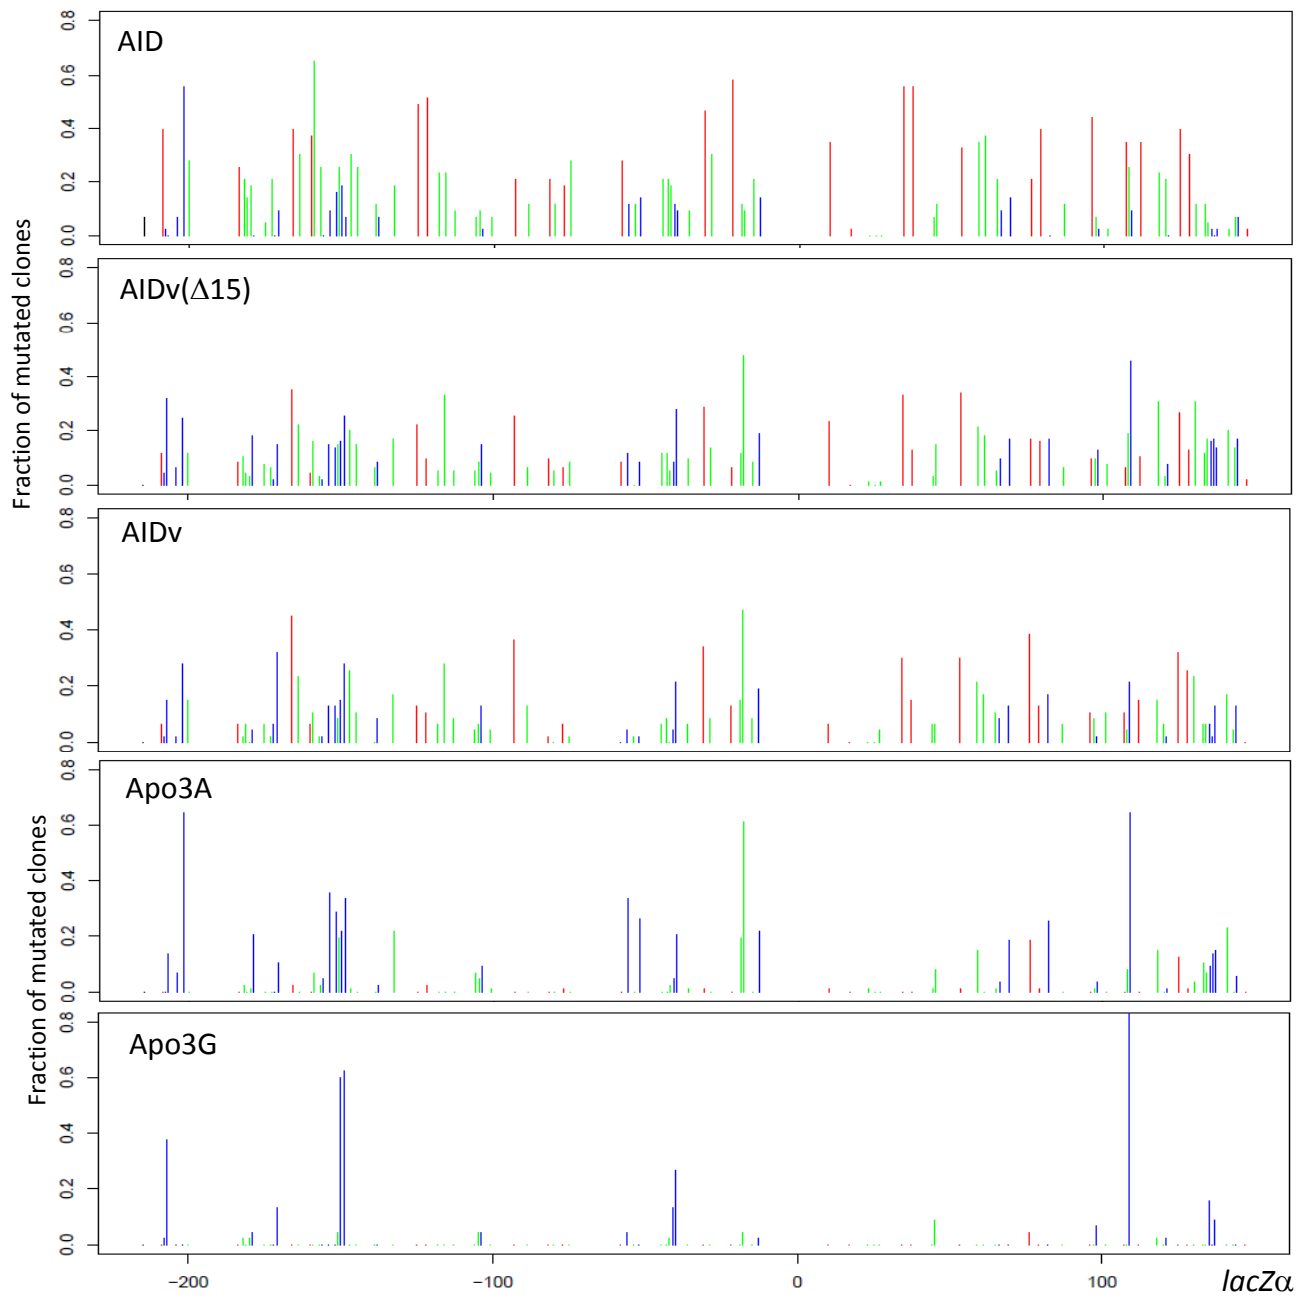

**Figure 4**

Supplement: NIHMS792099-supplement-1.pdf [file NIHMS792099-supplement-1.pdf]
